# Supplementary material for: Diffusion mechanism of Na ion–polaron complex in potential cathode materials NaVOPO4 and VOPO4 for rechargeable sodium-ion batteries
Source: Royal Society of Chemistry journal article supplement (doi:10.1039/c8cp03391a), 2018-01-01
Supplement: c8cp03391a1.pdf [file c8cp03391a1.pdf]

## Supplementary

### Diffusion mechanism of Na ion – polaron complex in potential cathode materials NaVOPO<sub>4</sub> and VOPO<sub>4</sub> of rechargeable sodium-ion batteries

Huu Duc Luong,<sup>a</sup> Thi Dung Pham,<sup>a</sup> Yoshitada Morikawa,<sup>b</sup> Yoji Shibutani<sup>a,c</sup> and Van An Dinh <sup>†a,c</sup>

<sup>a</sup> NanoTechnology Program, Vietnam – Japan University, National University of Hanoi, Luu Huu Phuoc Street, My Dinh I Ward, Nam Tu Liem District, Hanoi, Vietnam.

<sup>b</sup> Department of Precision Science and Applied Physic, Graduate School of Engineering, Osaka University, 2-1 Yamadaoka, Suita, Osaka 565-0871, Japan

<sup>c</sup> Center for Atomic and Molecular Technologies, Graduate School of Engineering, Osaka University, Yamadaoka 2-1, Osaka 565-0871, Japan.

<sup>†</sup> Corresponding author's email: dv.an@vju.ac.vn

Table S1: The on-site Coulomb  $U$  and the on-site exchange interaction  $J$  for GGA+U calculation

| TYPES                               | $U$ | $J$ | Band gap (eV) |
|-------------------------------------|-----|-----|---------------|
| Liechtenstein approach <sup>1</sup> | 4.2 | 0.7 | 2.179         |
|                                     | 4.5 | 1.0 | 2.120         |
|                                     | 5.6 | 0.7 | 2.120         |
|                                     | 3.1 | 0.0 | 1.940         |
| Dudarev approach <sup>2</sup>       | 3.5 | 0.0 | 2.028         |
|                                     | 3.8 | 0.0 | 2.066         |
|                                     | 4.0 | 0.0 | 2.023         |

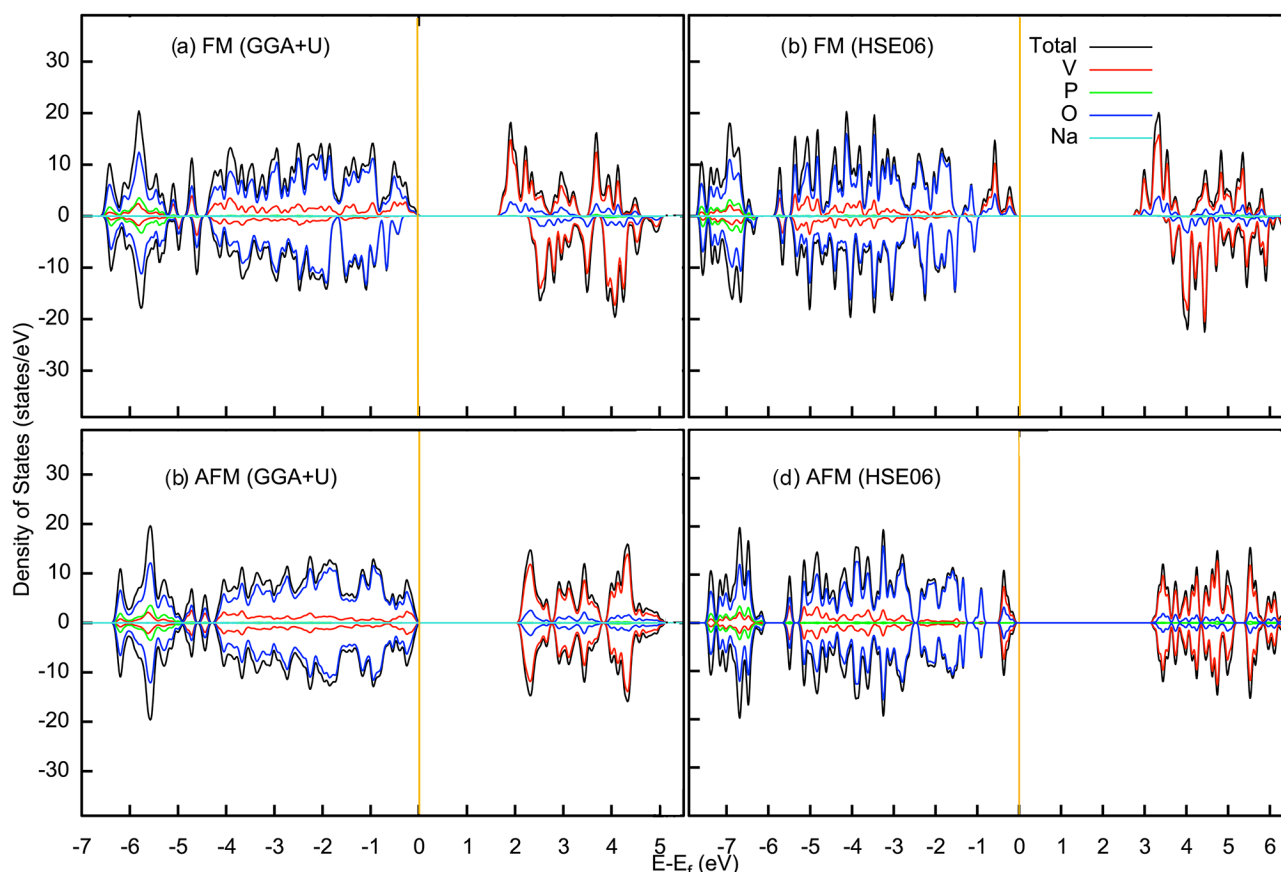

Figure S1: Density of state (DOS) of AFM and FM configurations of NaVOPO<sub>4</sub> obtained by GGA+U and HSE06. The negative (positive) value of DOS indicates the down (up) spin.

<sup>1</sup> A. I. Liechtenstein, V. I. Anisimov and J. Zaanen, Phys. Rev. B, 1995, 52, R5467.

<sup>2</sup> S. L. Dudarev, G. A. Botton, S. Y. Savrasov, C. J. Humphreys and A. P. Sutton, Phys. Rev. B, 1998, 57, 1505.

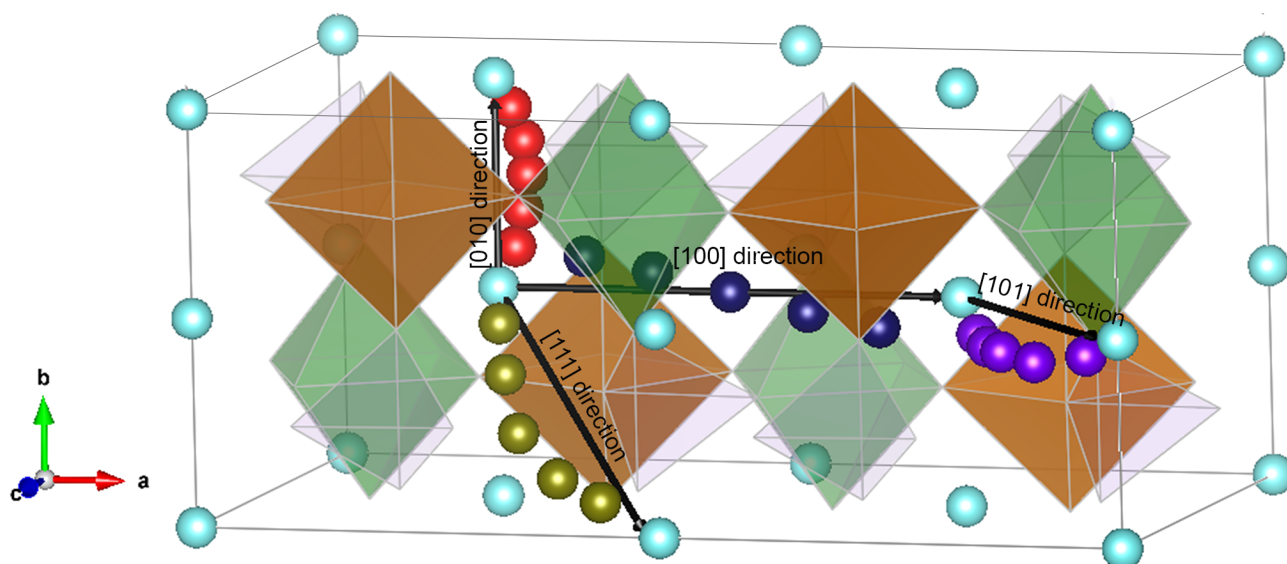

Figure S2: Diffusion directions in  $\text{NaVOPO}_4$

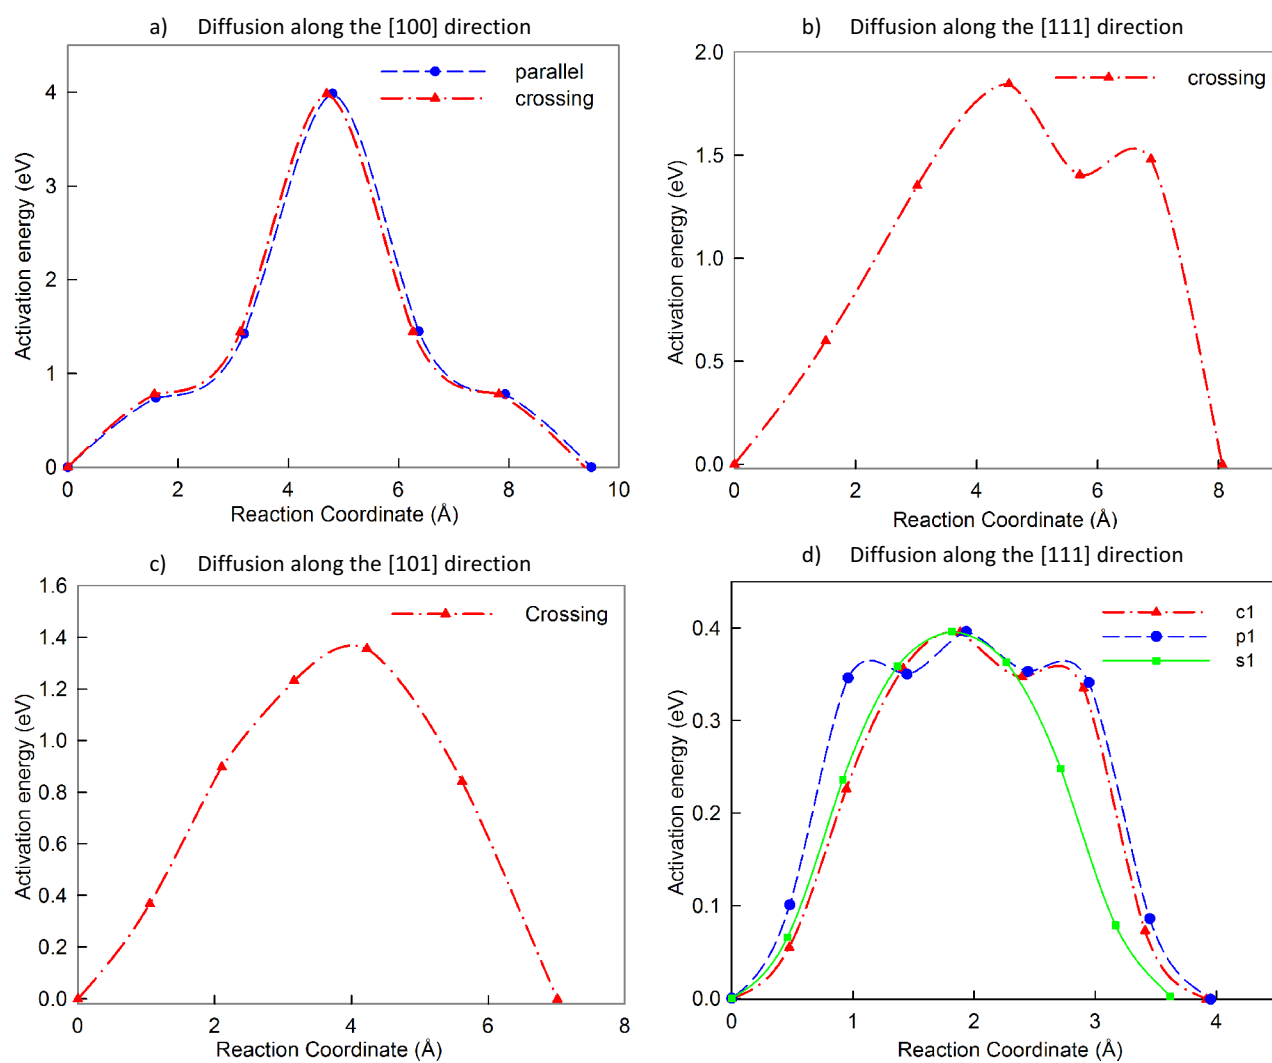

Figure S3: Activation energy profile of Na vacancy – positive polaron complex in  $\text{NaVOPO}_4$ . The red, blue and green curves correspond to the crossing, parallel and single diffusion processes, respectively.

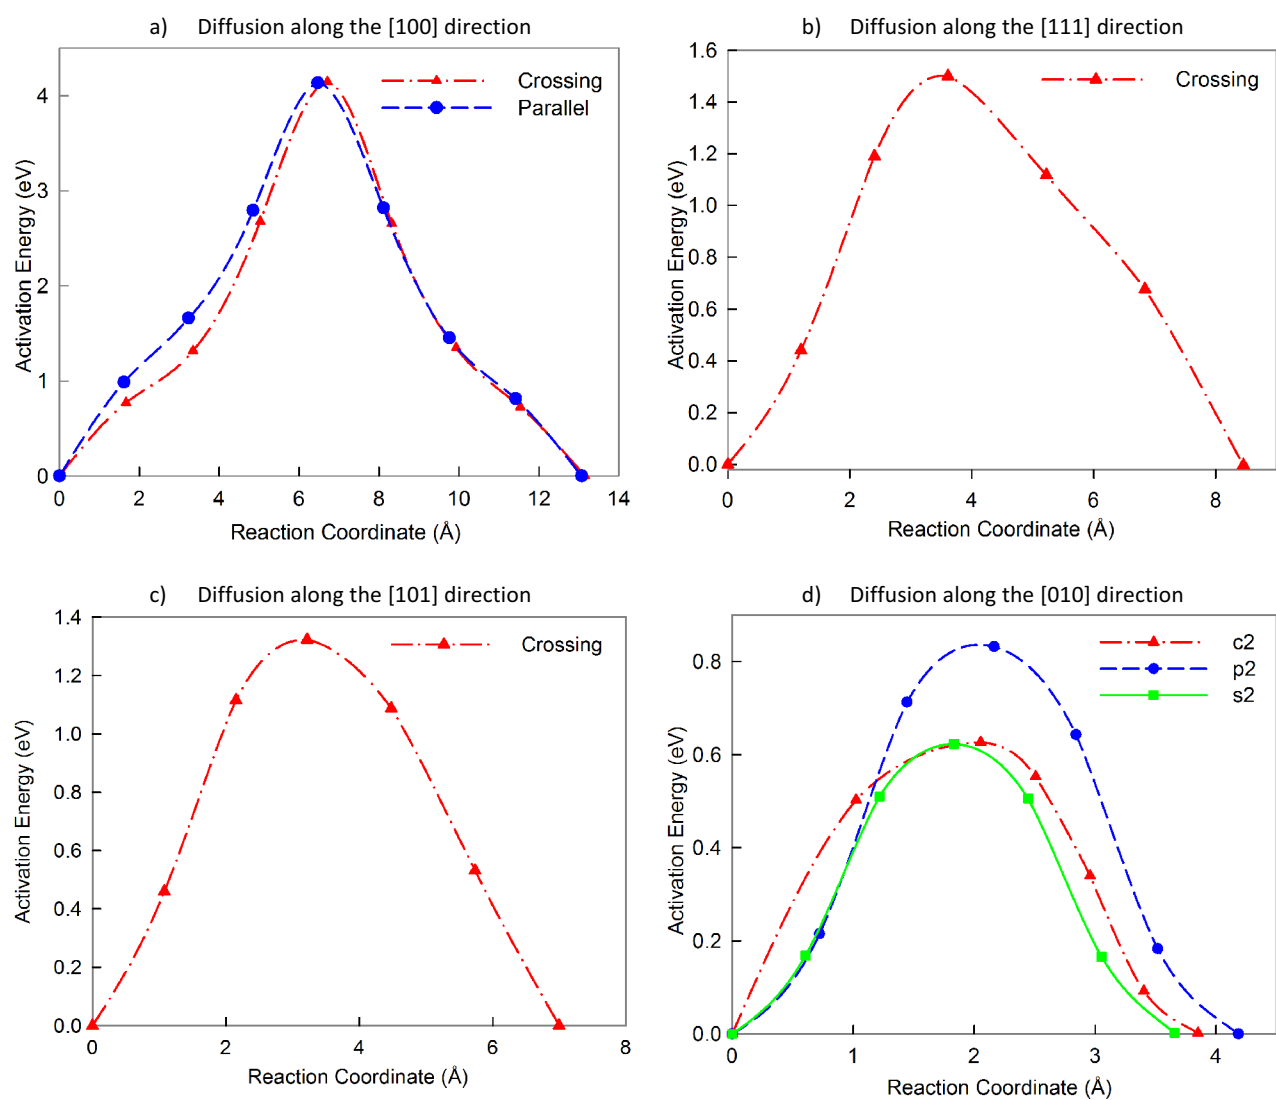

Figure S4: Activation energy profile of Na ion – negative polaron complex in  $\text{VOPO}_4$ . Red, blue and green curves illustrate the crossing, parallel and single diffusion processes, respectively.
